# Supplementary material for: Divergent Roles of RPA Homologs of the Model Archaeon Halobacterium salinarum in Survival of DNA Damage
Source: PubMed Central journal article supplement (PMC5924565; doi:10.3390/genes9040223), 2018-04-20
Supplement: genes-09-00223-s001.pdf [file genes-09-00223-s001.pdf]

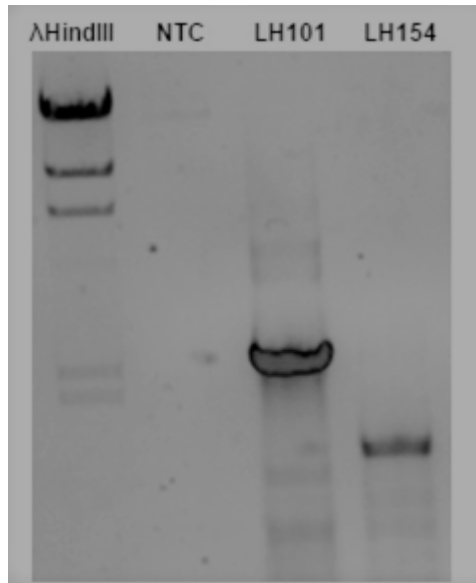

**Figure S1.** Verification of deletion of *rfa2* in LH154. Genomic DNA from LH101 (WT) and LH154 (LH102 $\Delta rfa2$ ) was used as template in PCR reactions with *rfa2*\_UF and *rfa2*\_DR primers. LH101 shows the expected 2581 bp wild-type band and LH154 shows the 1053 bp deletion band.

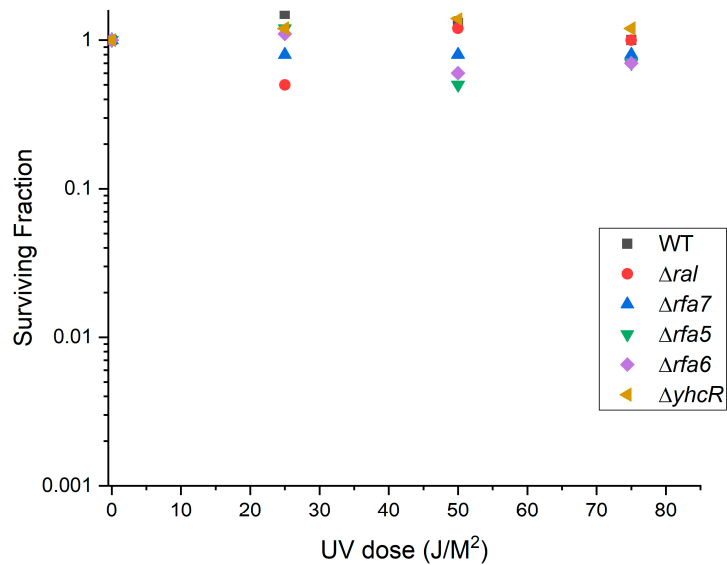

**Figure S2.** Survival of additional *Hbt. salinarum* deletion strains to UV-C damage. LH101 (WT), LH138 ( $\Delta ral$ ), LH166 ( $\Delta rfa7$ ), LH110 ( $\Delta rfa5$ ), LH128 ( $\Delta yhcr$ ) and LH1142 ( $\Delta rfa6$ ).

**Table S1.** Primers used for deletion creation and verification.

| Primer          | Sequence                                          | Source     |
|-----------------|---------------------------------------------------|------------|
| <i>rfa1</i> _UF | GCGCGAATTC <sup>1</sup> ACCGCCTGTGGTTCGTGATCG     | This study |
| <i>rfa1</i> _UR | CCTCGACGCGAGTACGACTCGCCATTGTCCGGTTCAGGCC          | This study |
| <i>rfa1</i> _DF | GGCCTGAACCGACAATGGGCGAGTCGTGACTCGCGTCGAGG         | This study |
| <i>rfa1</i> _DR | CGCGGAATTCGATATGTCTTCGGCTTGGACGGTGC               | This study |
| <i>rfa3</i> _UF | GCGCGAATTCGGCAGACAGAGCATGACGGCG                   | This study |
| <i>rfa3</i> _UR | CGCCGCTCATTTTCAGATCGACCGGTTCGCTCATGGTTCGTATCCG    | This study |
| <i>rfa3</i> _DF | CGGATACACGACCATGAGCGACCGGTTCGATCTGAAATGAGCGGCG    | This study |
| <i>rfa3</i> _DR | CGCGGAATTCGCTCGGCGTACTCGTTGCC                     | This study |
| <i>rfa8</i> _UF | GCGCGAATTCAGGGCCGATACTCGGTGAAGC                   | This study |
| <i>rfa8</i> _UR | GCGTTGTGCGCCCTACTCCGCGCTCATTTAGATCGACCTCGC        | This study |
| <i>rfa8</i> _DF | GCGAGTTCGATCTGAAATGAGCGCGGAGTGAGGGCGACAAACGC      | This study |
| <i>rfa8</i> _DR | CGCGGAATTCGCCAGCCGGAAGAAACGCG                     | This study |
| <i>ral</i> _UF  | GCGCGAATTCGCTGTACGCGTTGTCTCCG                     | This study |
| <i>ral</i> _UR  | CCGCCTATCCGAGCTGGTAGGTCCTCATGACCGGACAGTCGC        | This study |
| <i>ral</i> _DF  | GCGACTGTCCGGTACATGGGGACCTACCAGCTCGGATAGGCGG       | This study |
| <i>ral</i> _DR  | CGCGGAATTCACGCTTTTCCACTAACCCGCGG                  | This study |
| <i>rfa5</i> _UF | GCGCGAATTCGAGACATCGTCTCCCGGTAACCG                 | This study |
| <i>rfa5</i> _UR | GGTTGCGTCAGTTGGCTATGCTTCCCCGACAGAACCATCTGCGCGCTCT | This study |
| <i>rfa5</i> _DF | AGAGCGCGCAGATGGTTCTGTGCGGGGAAGCATAGCCAAGTACGCAACC | This study |
| <i>rfa5</i> _DR | CGCGGAATTCACAGTACGCACAAAGTGCCTGC                  | This study |
| <i>rfa6</i> _UF | GCGCGAATTCCTCGCGTTCGCGACCG                        | This study |
| <i>rfa6</i> _UR | GCGCCGACTGGCTATTCGTCCTTGACATTGGAACCTAGACCAGTCC    | This study |
| <i>rfa6</i> _DF | GGAAGTGGTCTAAGTTCCAATGTCAAGGGACGAATAGCCAGTCGGCGC  | This study |
| <i>rfa6</i> _DR | CGCGGAATTCCTAGTAGCCGGATCTCGGC                     | This study |
| <i>rfa2</i> _UF | GCGCGAATTCGCGACGAACACGGACAGCTCG                   | This study |
| <i>rfa2</i> _UR | TCGCTCATGCGTCCACCTCCGCCGCGACTGTATGCATGTTGTCG      | This study |
| <i>rfa2</i> _DF | CGACAACATGCATACAGTCGCGGGGAGGTGGACGCATGAGCGA       | This study |
| <i>rfa2</i> _DR | CGCGGAATTCGACGCGGTCTGTTGGCCG                      | This study |
| <i>rfa7</i> _UF | GCGCGAATTCACGAGGTTCGAGGTTCGGCGGG                  | This study |
| <i>rfa7</i> _UR | AGCGCCATCAGATGGCTTTCAGGCCGTCGCTCATGCGTCCACCTC     | This study |
| <i>rfa7</i> _DF | GAGGTGGACGCATGAGCGACGGCTGAAAGCCATCTGATGGCGCT      | This study |
| <i>rfa7</i> _DR | CGCGGAATTCGCTCGGTCAACCCGACCCG                     | This study |
| <i>yhcR</i> _UF | GCGCGAATTCATCCGAGACGGCGTCCGCG                     | This study |
| <i>yhcR</i> _UR | CGGTCCGCTCGGTACACCCCGGGCTCGACGAGCGCCATCA          | This study |
| <i>yhcR</i> _DF | TGATGGCGCTCGTCGAGCCCGGGGTGTAGCCGACGCGACCG         | This study |
| <i>yhcR</i> _DR | CGCGGAATTCGACGCTGCAAGTCCATCCC                     | This study |

<sup>1</sup> UF and DR primers have an EcoRI restriction site (underlined) engineered onto the 5' end for ligation into their corresponding plasmid.

**Table S2.** Transcript primers used for transcript visualization of the *rfa2* operon.

| Primer      | Sequence           | Purpose                                        |
|-------------|--------------------|------------------------------------------------|
| LCDrfa27upF | GTGGTCGCCGACACCATC | Amplification of the <i>rfa2/rfa7</i> junction |
| JPrfa72dnR  | CACCACGTCGTCGTTGAC |                                                |
| JPrfa7rupF  | CGCAGTGAGGTGGTGTG  | Amplification of the <i>rfa7/yhcR</i> junction |
| LCDyhcR7dnR | GTGTGTCCGTGTGCGAAC |                                                |

**Table S3.** qPCR primers and Taqman™ probes used in this study.

| Primer Name        | Sequence               | Source     |
|--------------------|------------------------|------------|
| <i>rfa1</i> _right | CCCACCACGAGATTCGACAC   | This study |
| <i>rfa1</i> _left  | GACCTCTCGTTGGGGGTTTC   | This study |
| <i>rfa1</i> _probe | CCTGGACACCGAGGCCGTCCGG | This study |
| <i>rfa2</i> _right | CCACGAGGTTCTGCAGGTTTC  | This study |
| <i>rfa2</i> _left  | CAACCCTTATGCCCCAGGAC   | This study |
| <i>rfa2</i> _probe | CGCCGAGGAGCTCGCTCCGAC  | This study |
| <i>rfa3</i> _right | GACTTCGACGGTGTCTGTTGC  | This study |
| <i>rfa3</i> _left  | GGAAGCACGGCTGGAGAAAC   | This study |

|                     |                           |            |
|---------------------|---------------------------|------------|
| <i>rfa3_probe</i>   | CCCGGTCGACGAGGCCCGCC      | This study |
| <i>rfa7_right</i>   | AAGACGCCACGACGAACA        | This study |
| <i>rfa7_left</i>    | GACGACGCCGACTTCTCGTA      | This study |
| <i>rfa7_probe</i>   | CGCCGAACACTACGTGGTGACGCCG | This study |
| <i>rfa8_right</i>   | TCGTTGCCCTCCTCGTTGAAG     | This study |
| <i>rfa8_left</i>    | CGATCACGATGGTTCGAGGAG     | This study |
| <i>rfa8_probe</i>   | CGAGGCCGCCGAGCGCACGC      | This study |
| <i>rfa56_right*</i> | CCCGTTCGGGGTTCGACCAT      | This study |
| <i>rfa56_left*</i>  | GGAGCGTATTCGGGCGCAGGAA    | This study |
| <i>rfa56_probe*</i> | GGCCGAGCTGGGAACGCAGGACGG  | This study |
| <i>ef2_right</i>    | TGTCAGTGAGGGTGGTTTTTCC    | This study |
| <i>ef2_left</i>     | ACGAAAGAAGATTGTCGAACAGTG  | This study |
| <i>ef2_probe</i>    | AACGGCTGATGGACAACCCGGAGC  | This study |

---
